# Supplementary material
Source: Springer Nature journal article supplement (https://www.springermedizin.de/resource/supplementary/13012_2012_594_MOESM9_ESM.pdf/9630336)
Supplement: MOESM9 [file 9630336]

## Domain: Teamwork context

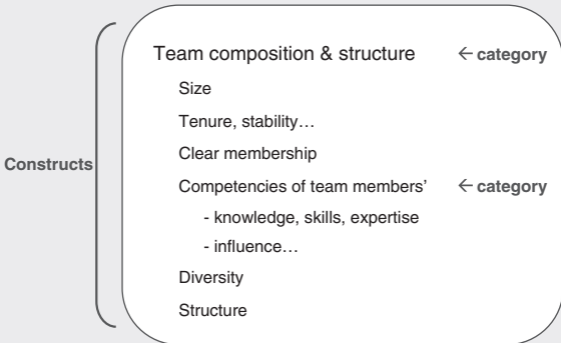

*Domain* refers to the broad categories depicted in the framework (context, process, outcomes). Instrument content is categorised under these domains, and the domain names are used throughout the review.

*Constructs* are the factors included in each domain. More specifically, *constructs* are the concept(s) or characteristic(s) that an instrument is designed to measure. An instrument might be designed to measure a broad construct (e.g. competencies of team members) or a narrower construct (e.g. knowledge, skills and expertise).

*Category* is a general term we use to refer to any grouping of related constructs, irrespective of level.
